# Supplementary material for: Simultaneous Rapid Detection of Aflatoxin B1 and Ochratoxin A in Spices Using Lateral Flow Immuno-Chromatographic Assay
Source: MDPI journal article supplement (doi:10.3390/foods10112738), 2021-11-09
Supplement: s1 [file s1]

Supplementary material

# Simultaneous Rapid Detection of Aflatoxin B<sub>1</sub> and Ochratoxin A in Spices Using Lateral Flow Immuno-Chromatographic Assay

Xue Zhao <sup>1,†</sup>, Xindi Jin <sup>1,†</sup>, Zhang Lin <sup>1</sup>, Qi Guo <sup>1</sup>, Bin Liu <sup>1,2</sup>, Yahong Yuan <sup>1,2</sup>, Tianli Yue <sup>1,2</sup> and Xubo Zhao <sup>1,2\*</sup>

<sup>1</sup> College of Food Science and Engineering, Northwest A&F University, No. 22 Xinong Road, Yangling, Shaanxi 712100, China; 15735172570@163.com (X.Z.); xd.jin@nwafu.edu.cn (X.J.); linzhang@nwafu.edu.cn (Z.L.); guoqiqi@nwafu.edu.cn (Q.G.); liubin7723@163.com (B.L.); yyh324@tom.com (Y.Y.); yuetl@nwafu.edu.cn (T.Y.)

<sup>2</sup> Laboratory of Quality & Safety Risk Assessment for Agro-Products (Yangling), Ministry of Agriculture and Rural Affairs, Yangling, Shaanxi 712100, China

\* Correspondence: zhuxubo@nwafu.edu.cn

† These authors contributed equally to this work

**Table S1.** Cross-reaction experiment data of test strips.

**Citation:** Zhao, X.; Jin, X.; Lin, Z.; Guo, Q.; Liu, B.; Yuan, Y.; Yue, T.; Zhao, X. Simultaneous Rapid Detection of Aflatoxin B<sub>1</sub> and Ochratoxin A in Spices Using Lateral Flow Immuno-Chromatographic Assay. *Foods* 2021, 10, 2738. <https://doi.org/10.3390/foods10112738>

Academic Editor: Cristina A. Fente

Received: 28 October 2021 Accepted: 4 November 2021 Published: date

**Publisher's Note:** MDPI stays neutral with regard to jurisdictional claims in published maps and institutional affiliations.

| Structural analogs | Photometric value | Add level (µg/L) |        |        |        |        |        | IC <sub>50</sub> (µg/L) | Cross reaction rate (%) |
|--------------------|-------------------|------------------|--------|--------|--------|--------|--------|-------------------------|-------------------------|
|                    |                   | 0.0              | 1.0    | 5.0    | 20.0   | 50.0   | 100.0  |                         |                         |
| G <sub>2</sub>     | Control           | 12.11            | 12.16  | 15.10  | 12.12  | 11.15  | 15.17  | -                       | -                       |
|                    | AFB <sub>1</sub>  | 165.24           | 164.22 | 170.14 | 170.10 | 164.12 | 172.29 | > 1000.0                | <1                      |
|                    | OTA               | 136.21           | 136.18 | 136.13 | 135.29 | 130.23 | 128.16 | -                       | -                       |
| G <sub>1</sub>     | Control           | 12.17            | 12.27  | 12.21  | 13.15  | 23.11  | 73.19  | -                       | -                       |
|                    | AFB <sub>1</sub>  | 164.06           | 169.14 | 167.24 | 170.12 | 166.27 | 130.15 | 278.6                   | 4.20                    |
|                    | OTA               | 130.28           | 129.13 | 131.12 | 135.19 | 132.13 | 132.11 | -                       | -                       |
| B <sub>2</sub>     | Control           | 14.13            | 12.19  | 12.17  | 13.16  | 64.19  | 128.25 | -                       | -                       |
|                    | AFB <sub>1</sub>  | 169.18           | 169.20 | 172.11 | 170.13 | 130.26 | 100.17 | 151.1                   | 7.7                     |
|                    | OTA               | 132.25           | 131.15 | 135.19 | 134.26 | 135.11 | 131.13 | -                       | -                       |
| B <sub>1</sub>     | Control           | 12.10            | 55.12  | 108.16 | 165.12 | 185.16 | 193.20 | -                       | -                       |
|                    | AFB <sub>1</sub>  | 173.13           | 145.11 | 110.20 | 70.16  | 42.09  | 25.12  | 11.6                    | 100.0                   |
|                    | OTA               | 132.23           | 135.26 | 130.17 | 132.27 | 131.12 | 136.19 | -                       | -                       |

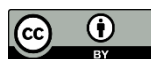

**Copyright:** © 2021 by the authors. Submitted for possible open access publication under the terms and conditions of the Creative Commons Attribution (CC BY) license (<http://creativecommons.org/licenses/by/4.0/>).
